# Supplementary material for: Redox-couple investigations in Si-doped Li-rich cathode materials
Source: Royal Society of Chemistry journal article supplement (doi:10.1039/d0cp05737a), 2021-01-01
Supplement: d0cp05737a1.pdf [file d0cp05737a1.pdf]

Supplementary Material

**Table S.1.** Chemical shifts determined by the white line ratio method.

| Comparison                                  | $L_3/L_2$ White Line Ratio Difference |       |       |
|---------------------------------------------|---------------------------------------|-------|-------|
|                                             | Mn                                    | Co    | Ni    |
| <i>Pristine control v pristine Si-doped</i> | -0.01                                 | -0.19 | -0.12 |
| Pristine control v 4.4 V control            | -0.07                                 | -0.02 | -1.08 |
| Pristine control v 4.6 V control            | -0.09                                 | 0.23  | 0.93  |
| Pristine Si-doped v 4.4V Si-doped           | 0.03                                  | 0.82  | -0.46 |
| Pristine Si-doped v 4.6V Si-doped           | 0.03                                  | 0.44  | -0.22 |

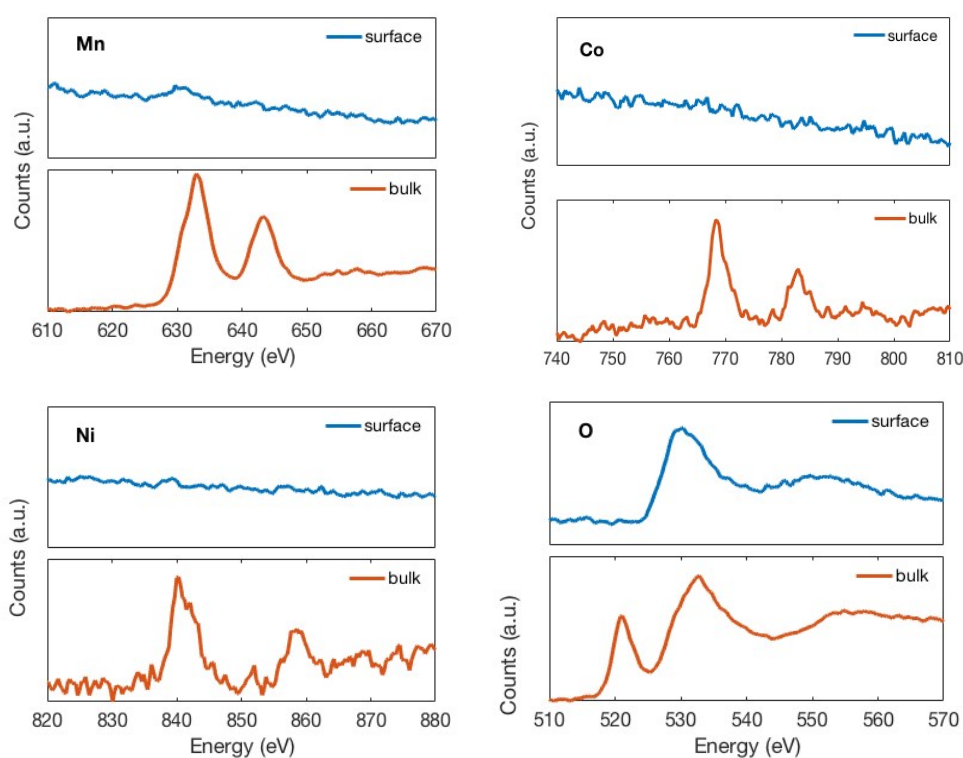

**Figure S.1.** EELS spectra of control HE-NMC charged to 4.4V from a pixel taken at the surface and in the bulk for a) manganese L-edge, b) cobalt L-edge, c) nickel L-edge, and d) oxygen K-edge.
